# Supplementary material
Source: PubMed Central journal article supplement (PMC6402951)
Supplement: NIHMS1006725-supplement-SI.pdf [file NIHMS1006725-supplement-SI.pdf]

Supporting Information

## Redox and "Antioxidant" Properties of $\text{Fe}_2(\mu\text{-SH})_2(\text{CO})_4(\text{PPh}_3)_2$

Husain N. Kagalwala, Noemie Lalaoui, Qian-Li Li, Liang Liu,  
Toby Woods, and Thomas B. Rauchfuss\*

School of Chemical Sciences

University of Illinois

Urbana, IL 61801, USA

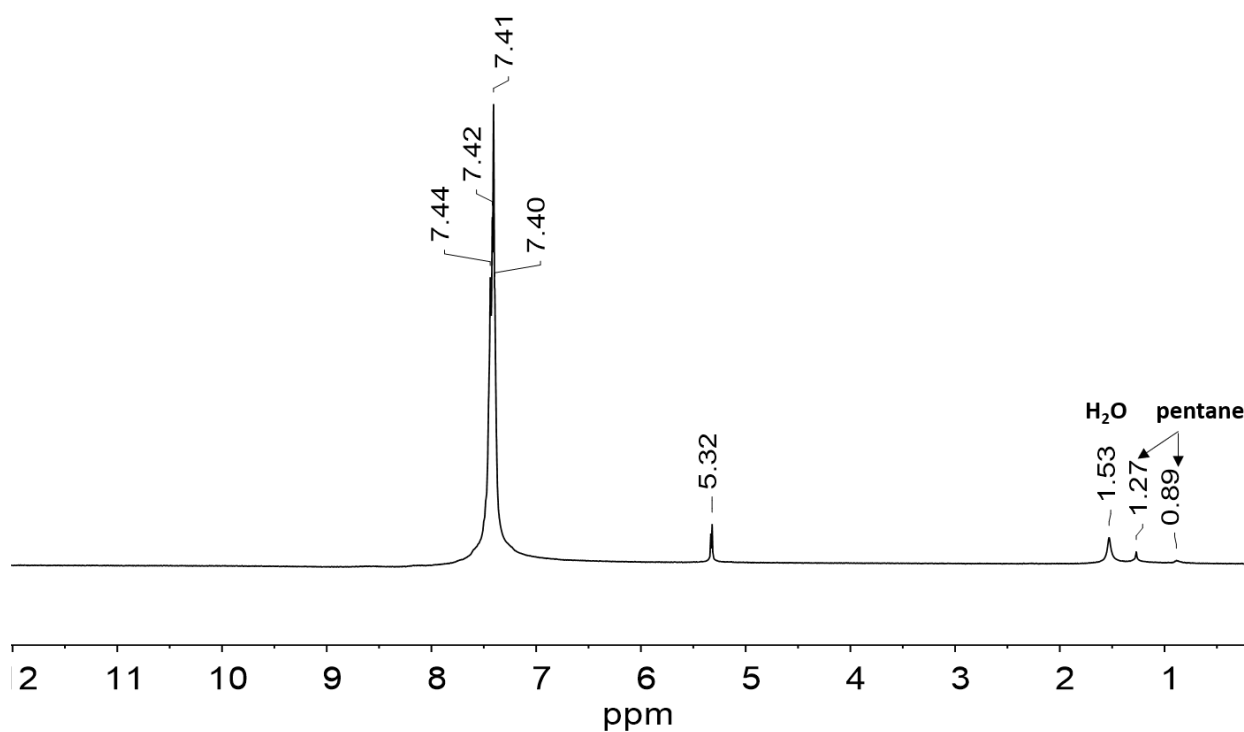

**Figure S1.**  $^1\text{H}$  NMR spectrum (500 MHz,  $\text{CD}_2\text{Cl}_2$ ) of  $\text{Fe}_2(\mu\text{-S}_2)(\text{CO})_4(\text{PPh}_3)_2$  at 20 °C.

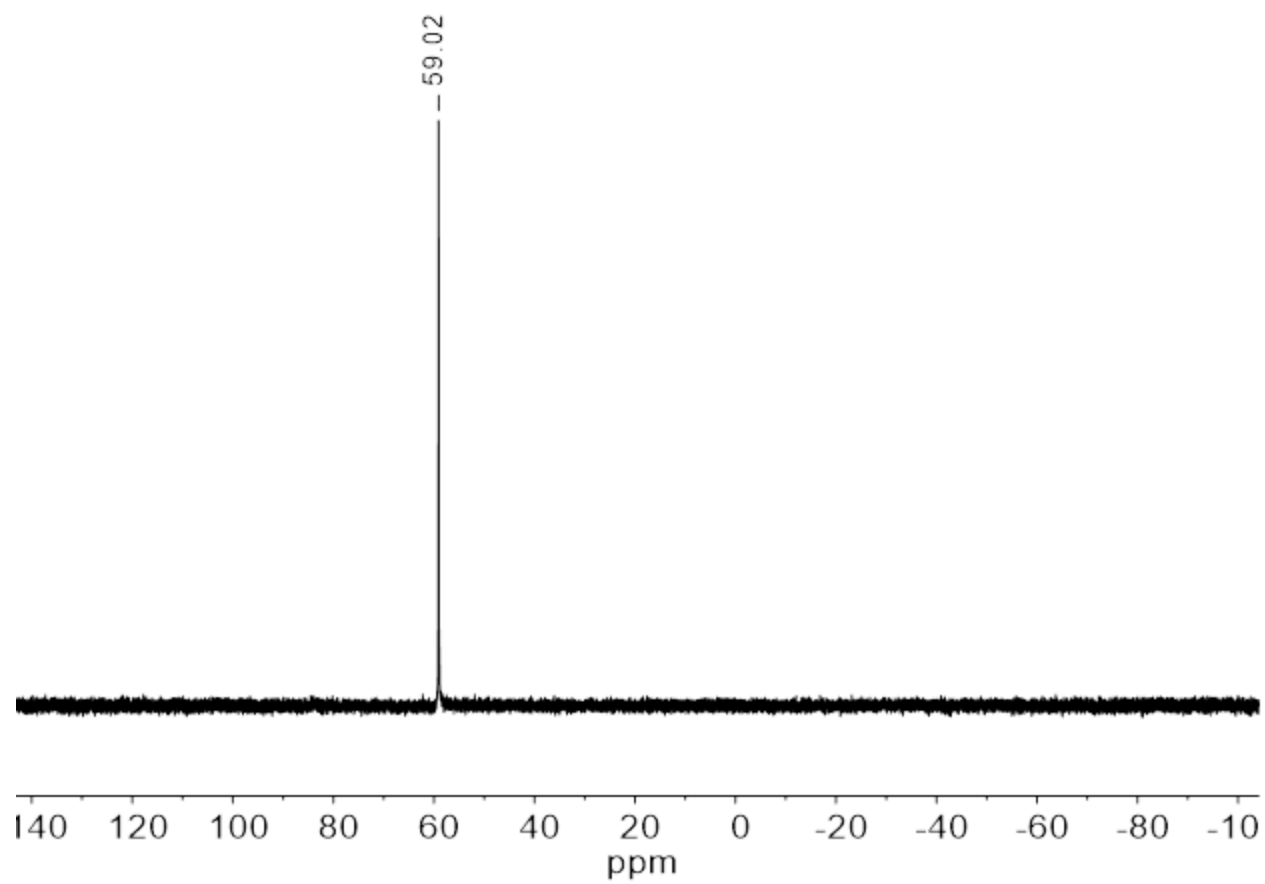

**Figure S2.**  $^{31}\text{P}$  NMR spectrum (202 MHz,  $\text{CD}_2\text{Cl}_2$ ) of  $\text{Fe}_2(\mu\text{-S}_2)(\text{CO})_4(\text{PPh}_3)_2$  at 20 °C.

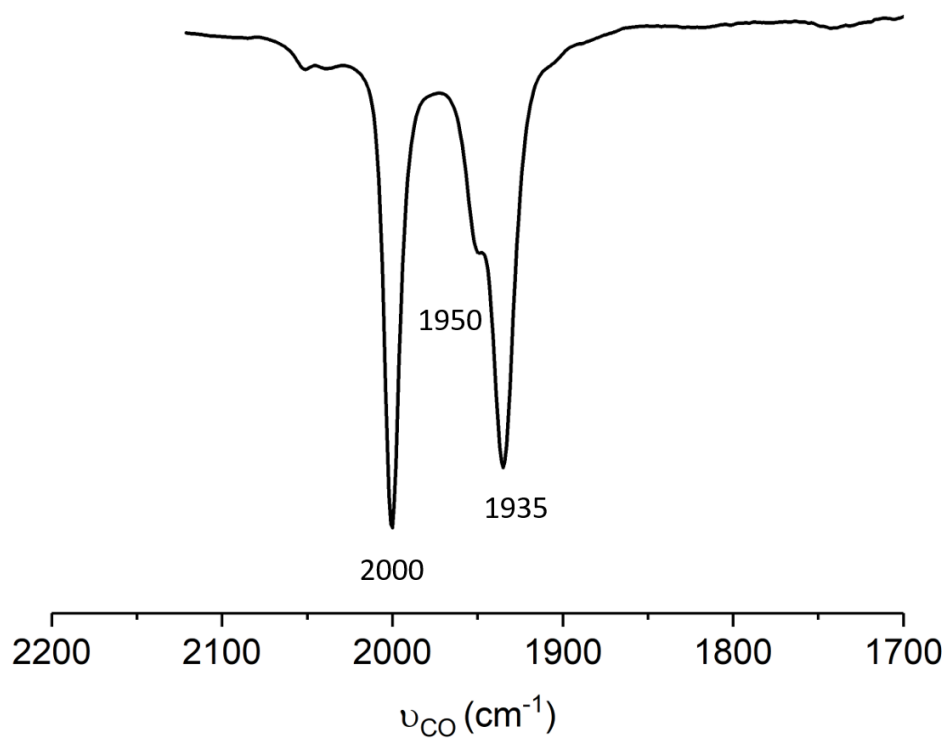

**Figure S3.** IR spectrum of  $\text{Fe}_2(\mu\text{-S}_2)(\text{CO})_4(\text{PPh}_3)_2$  in  $\text{CH}_2\text{Cl}_2$  solution (20 °C).

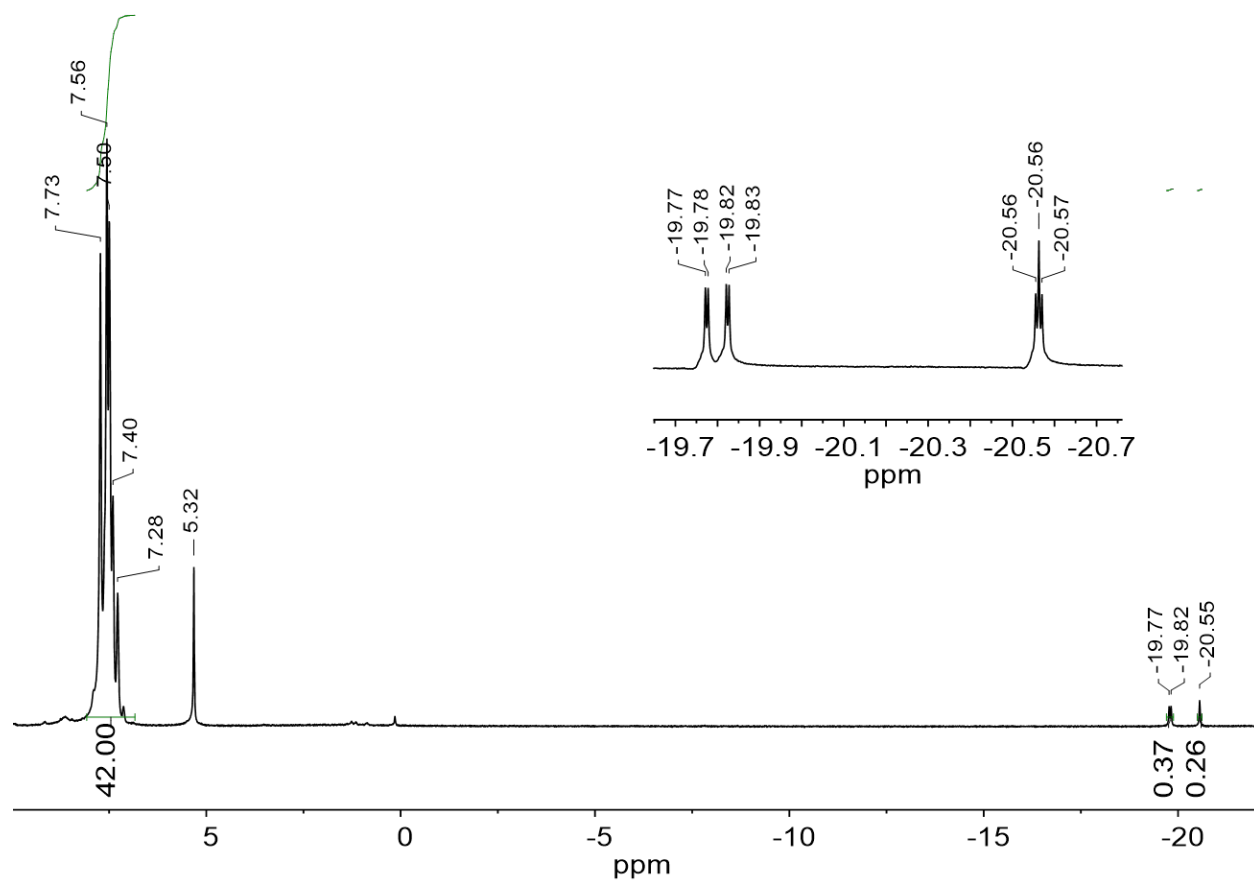

**Figure S4.**  $^1\text{H}$  NMR spectrum (500 MHz,  $\text{CD}_2\text{Cl}_2$ ) of  $[(\mu\text{-H})\text{Fe}_2(\mu\text{-S}_2)(\text{CO})_4(\text{PPh}_3)_2]\text{BARF}_4$  at  $20^\circ\text{C}$ . *Inset:* expansion of high field region.

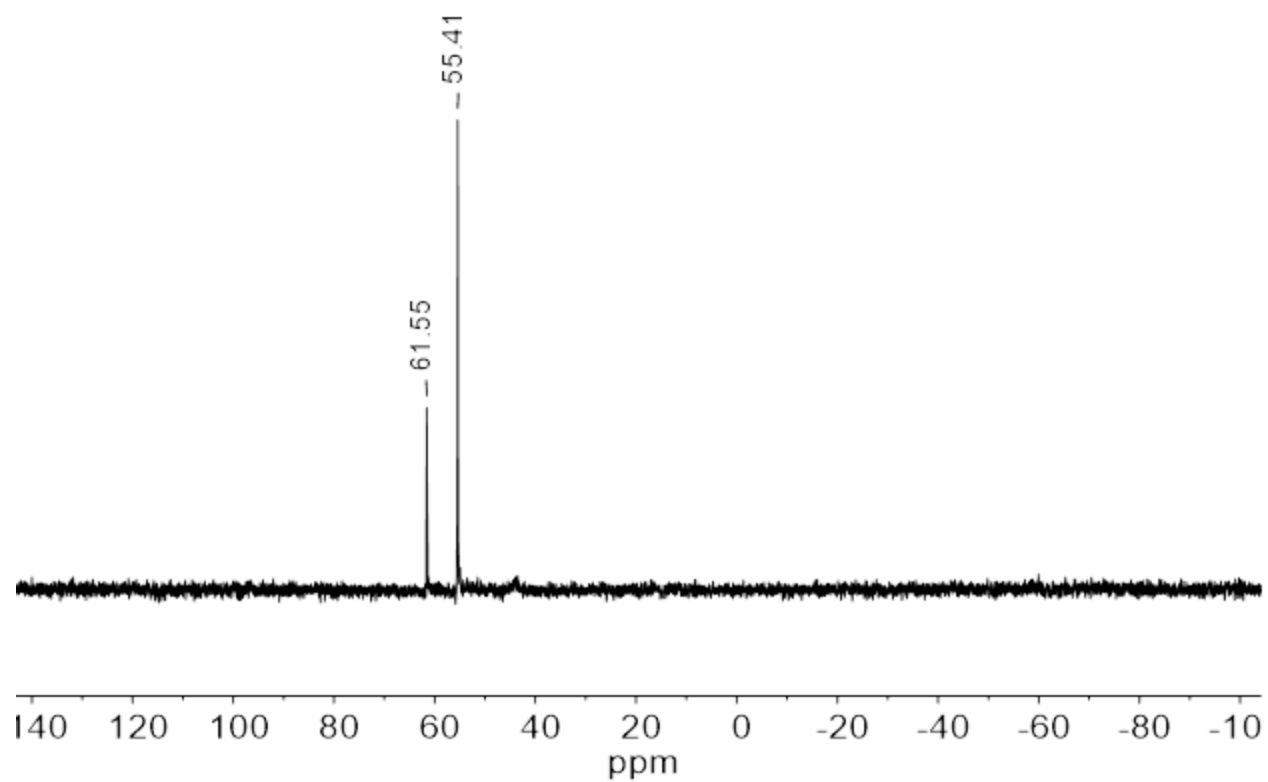

**Figure S5.**  $^{31}\text{P}$  NMR spectrum (202 MHz,  $\text{CD}_2\text{Cl}_2$ ) of  $[(\mu\text{-H})\text{Fe}_2(\mu\text{-S}_2)(\text{CO})_4(\text{PPh}_3)_2]\text{BARF}_4$  at 20 °C.

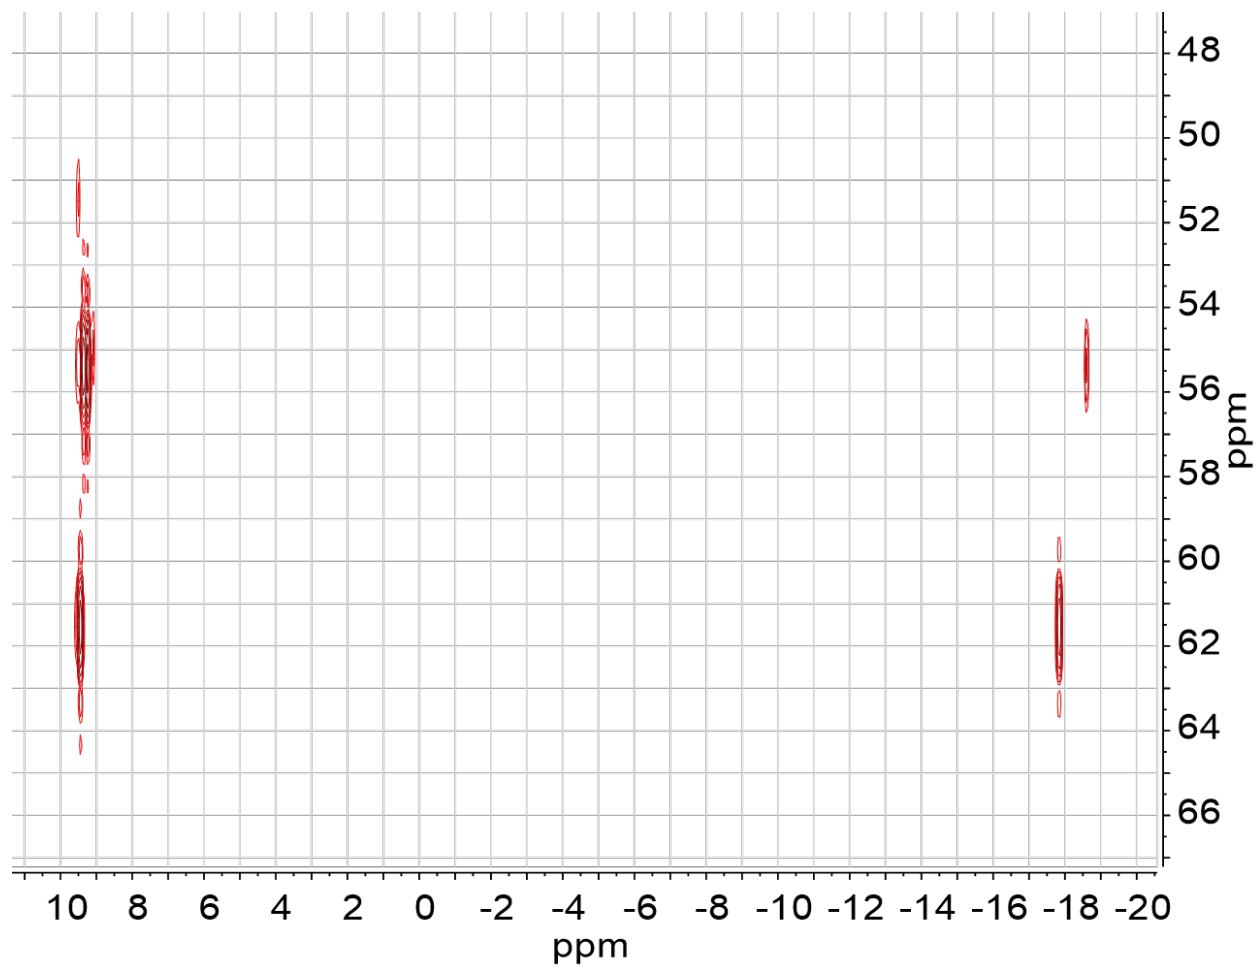

**Figure S6.**  $^1\text{H}$ - $^{31}\text{P}$  HMBC spectrum of  $[(\mu\text{-H})\text{Fe}_2(\mu\text{-S}_2)(\text{CO})_4(\text{PPh}_3)_2]\text{BAr}^{\text{F}}_4$  at 20 °C.

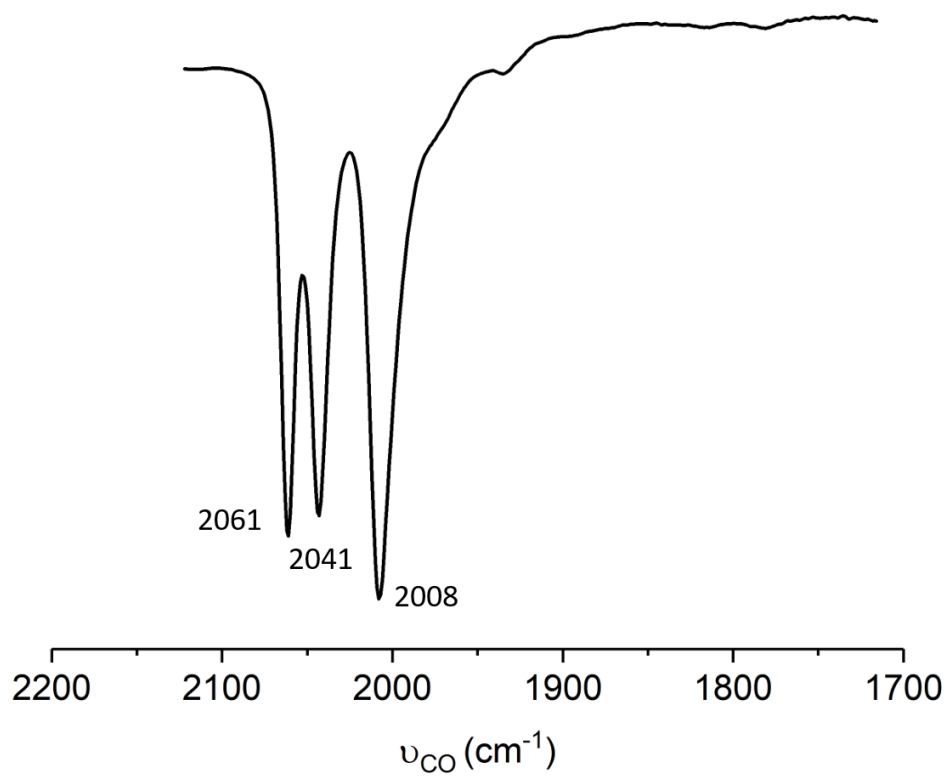

**Figure S7.** IR spectrum in  $\text{CH}_2\text{Cl}_2$  solution of  $[(\mu\text{-H})\text{Fe}_2(\mu\text{-S}_2)(\text{CO})_4(\text{PPh}_3)_2]\text{BAr}^{\text{F}}_4$  at 20  $^\circ\text{C}$ .

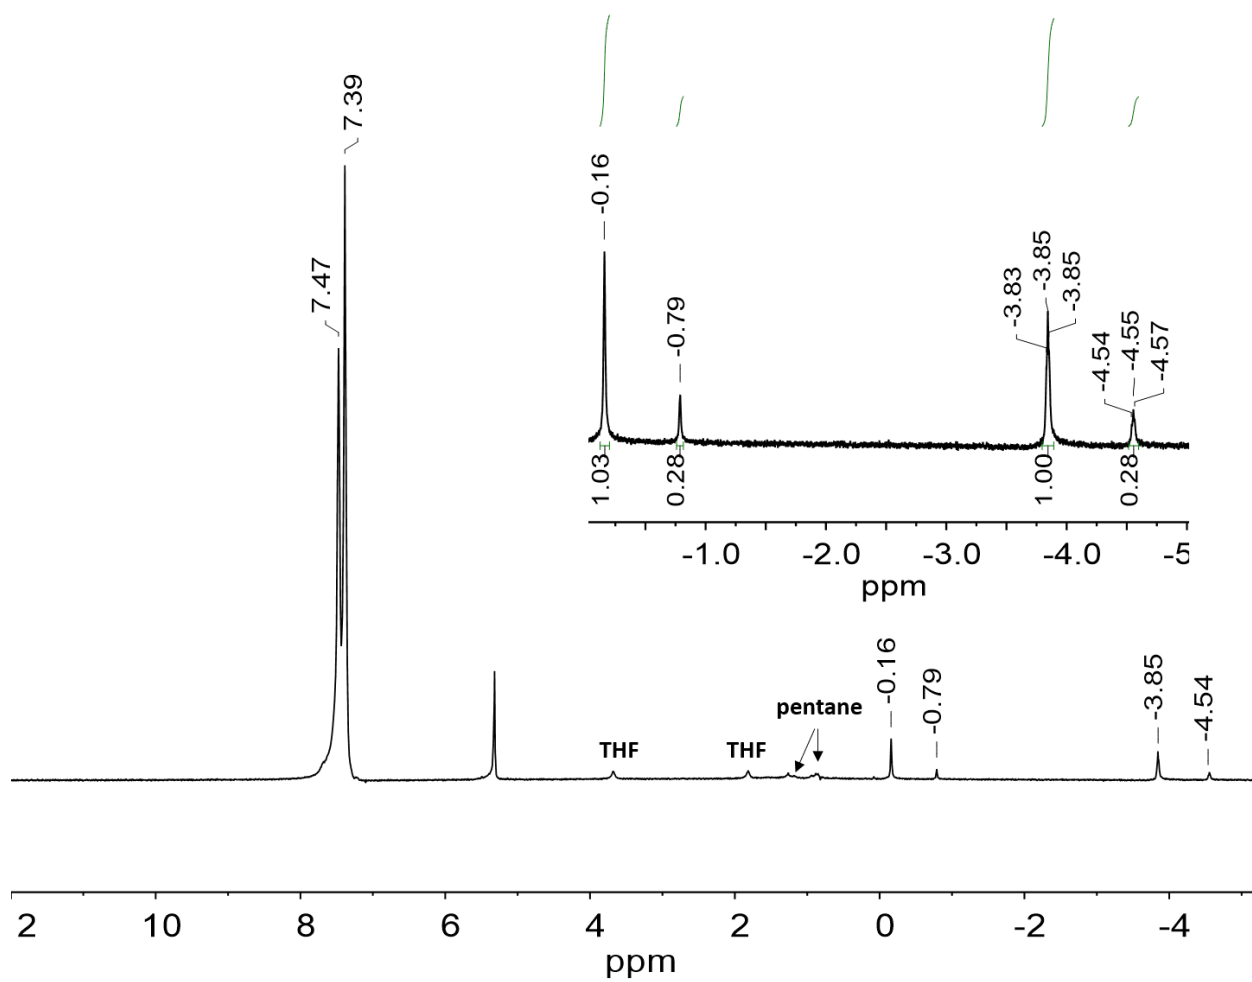

**Figure S8.**  $^1\text{H}$  NMR spectrum (500 MHz,  $\text{CD}_2\text{Cl}_2$ ) of  $\text{Fe}_2(\mu\text{-SH})_2(\text{CO})_4(\text{PPh}_3)_2$  at  $20^\circ\text{C}$ .



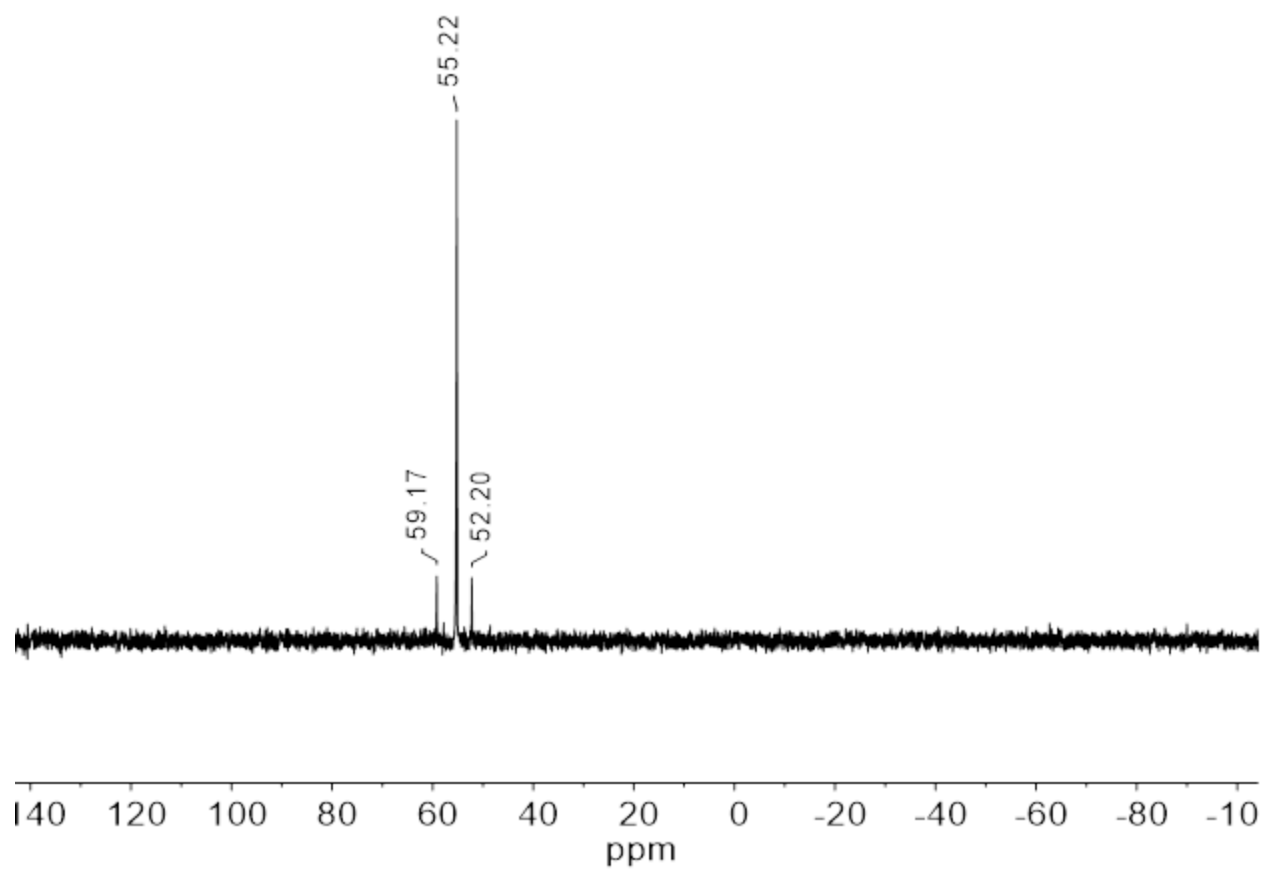

**Figure S9.**  $^{31}\text{P}$  NMR spectrum (202 MHz,  $\text{CD}_2\text{Cl}_2$ ) of  $\text{Fe}_2(\mu\text{-SH})_2(\text{CO})_4(\text{PPh}_3)_2$  at 20 °C.

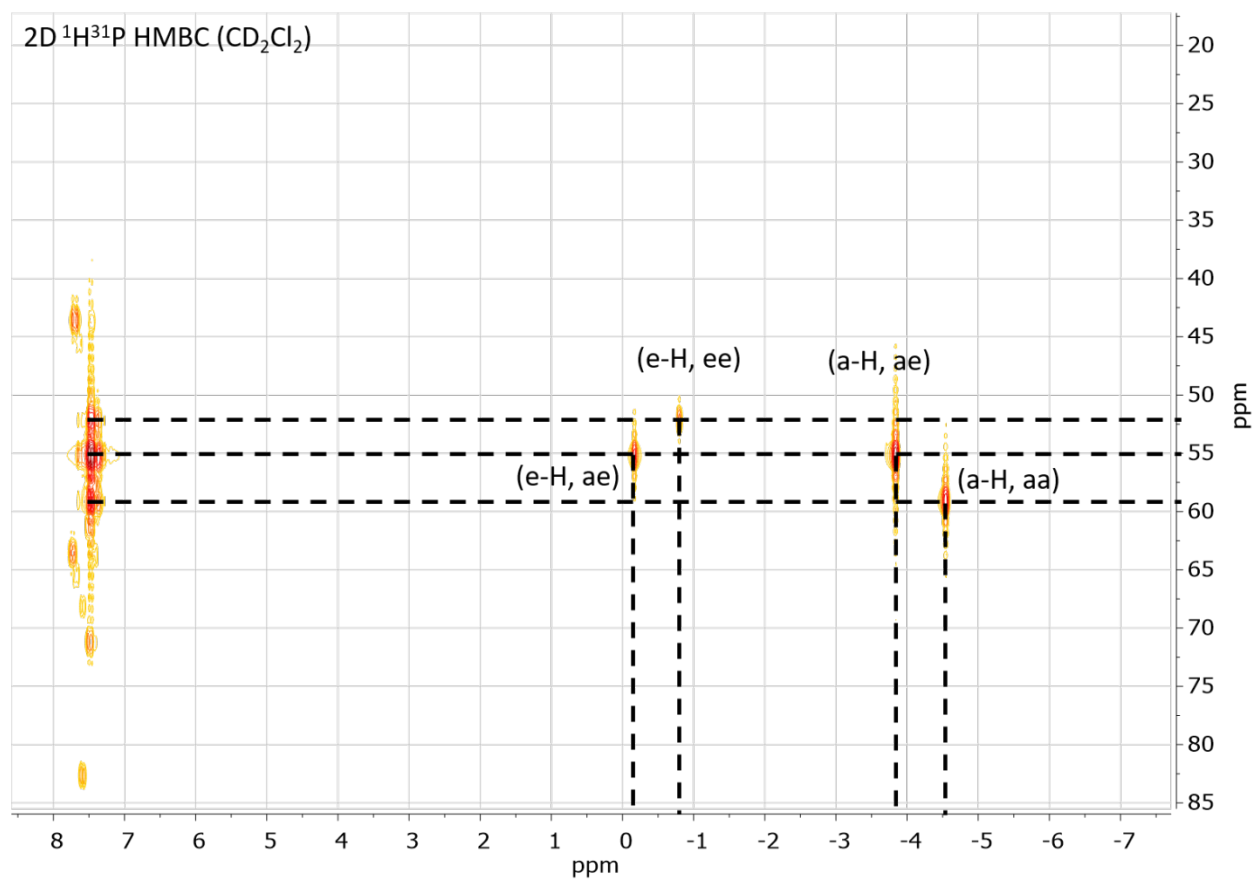

**Figure S10.**  $^1\text{H}$ - $^{31}\text{P}$  HMBC spectrum of  $\text{Fe}_2(\mu\text{-SH})_2(\text{CO})_4(\text{PPh}_3)_2$  at 20 °C.

S11

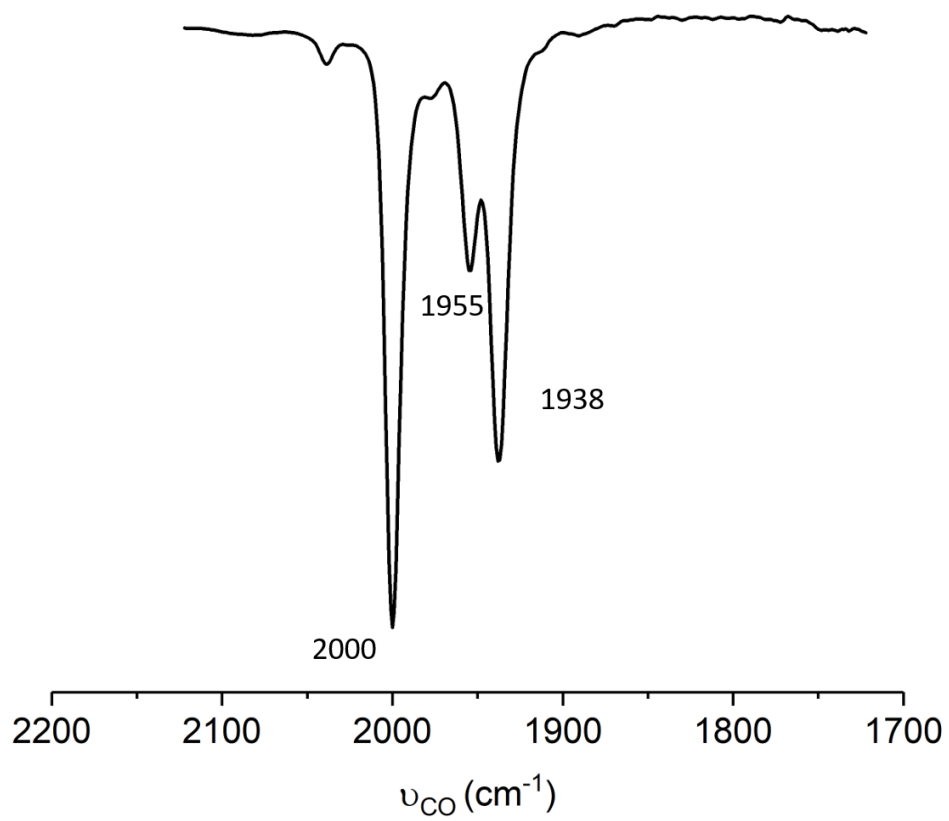

**Figure S11.** IR spectrum in  $\text{CH}_2\text{Cl}_2$  of  $\text{Fe}_2(\mu\text{-SH})_2(\text{CO})_4(\text{PPh}_3)_2$  at 20 °C.

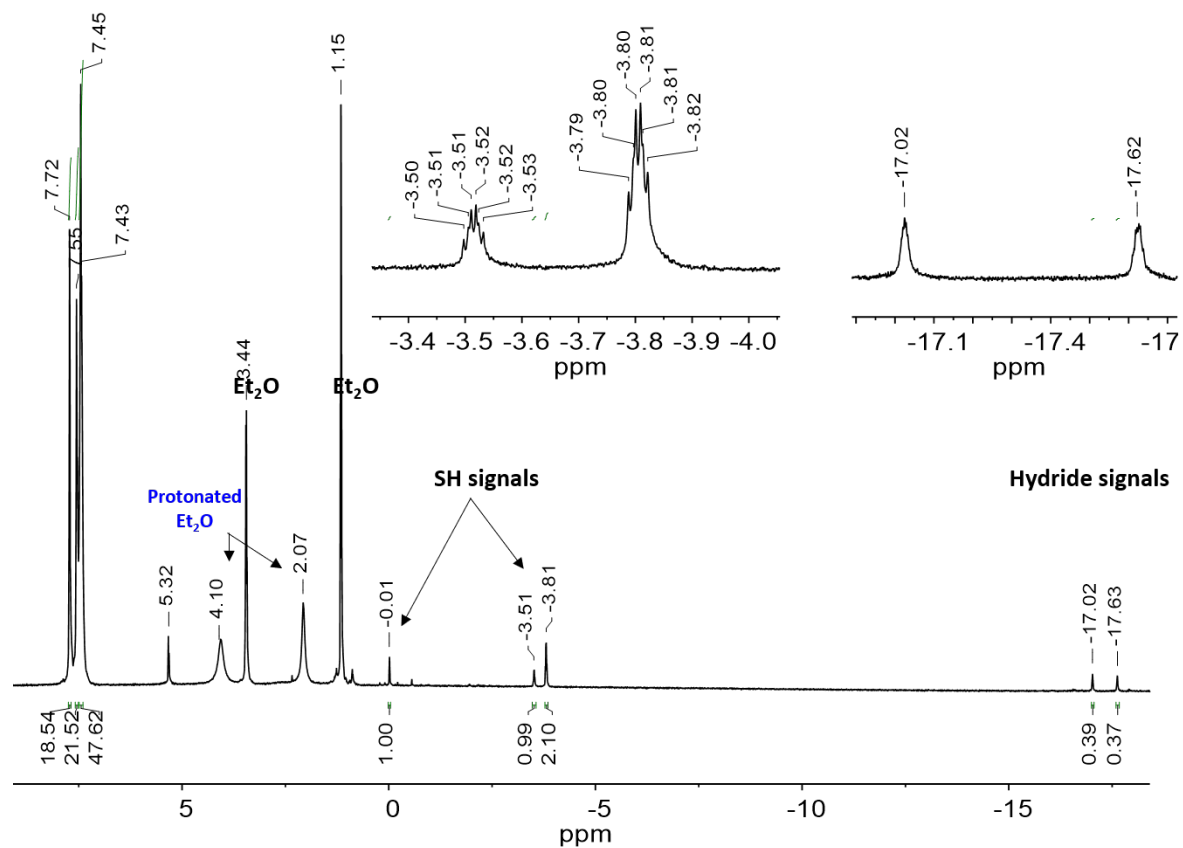

**Figure S12.**  $^1\text{H}$  NMR spectrum (500 MHz,  $\text{CD}_2\text{Cl}_2$ ) of  $[(\mu\text{-H})\text{Fe}_2(\mu\text{-SH})_2(\text{CO})_4(\text{PPh}_3)_2]\text{BARF}_4$  (generated *in situ*) at  $-20^\circ\text{C}$ . The hydride signals indicate approximately 1:1 isomer ratio.

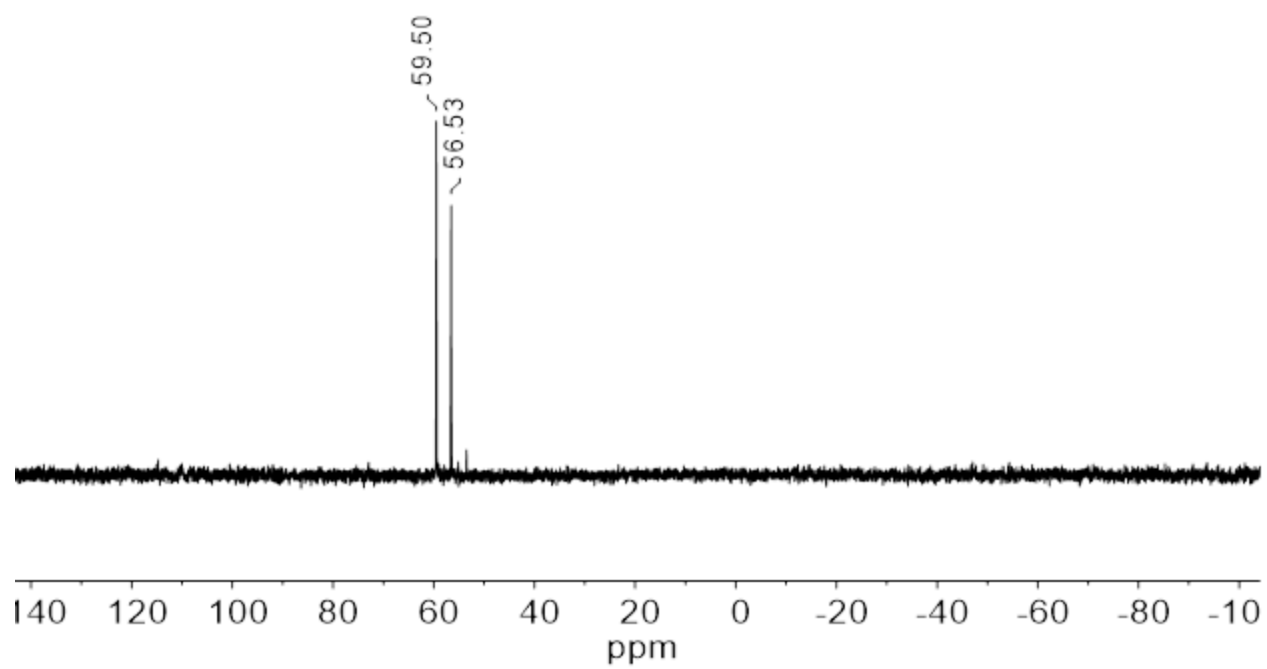

**Figure S13.**  $^{31}\text{P}$  NMR spectrum (202 MHz,  $\text{CD}_2\text{Cl}_2$ ) of  $[(\mu\text{-H})\text{Fe}_2(\mu\text{-SH})_2(\text{CO})_4(\text{PPh}_3)_2]\text{BArF}_4$  (generated *in situ*) at  $-20\text{ }^\circ\text{C}$ .

2D  $^1\text{H}$ - $^{31}\text{P}$  HMBC ( $\text{CD}_2\text{Cl}_2$ ,  $-50^\circ\text{C}$ )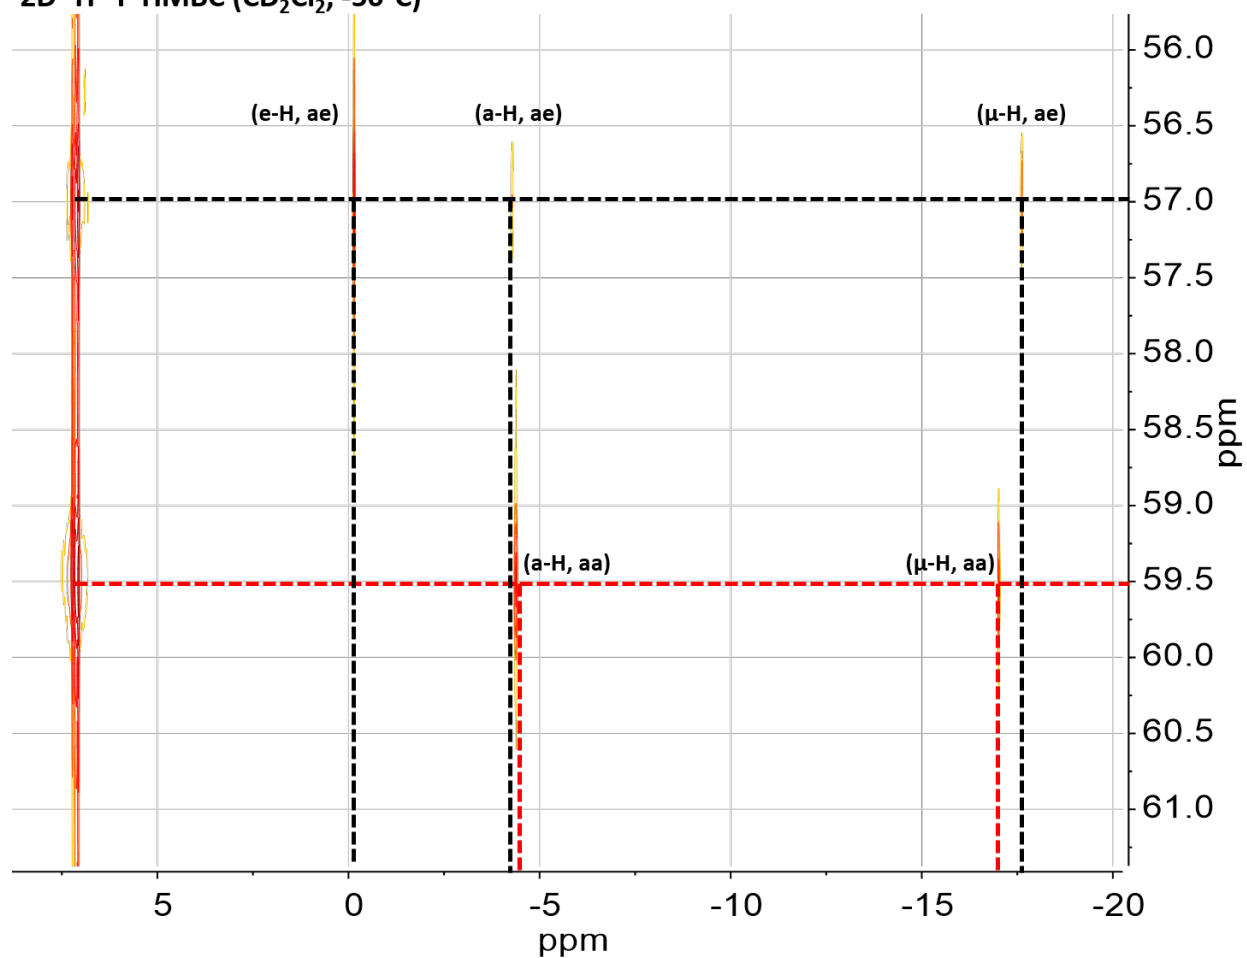

**Figure S14.**  $^1\text{H}$ - $^{31}\text{P}$  HMBC spectrum of  $[(\mu\text{-H})\text{Fe}_2(\mu\text{-SH})_2(\text{CO})_4(\text{PPh}_3)_2]\text{BARF}_4$  (generated *in situ*) at  $-50^\circ\text{C}$ .

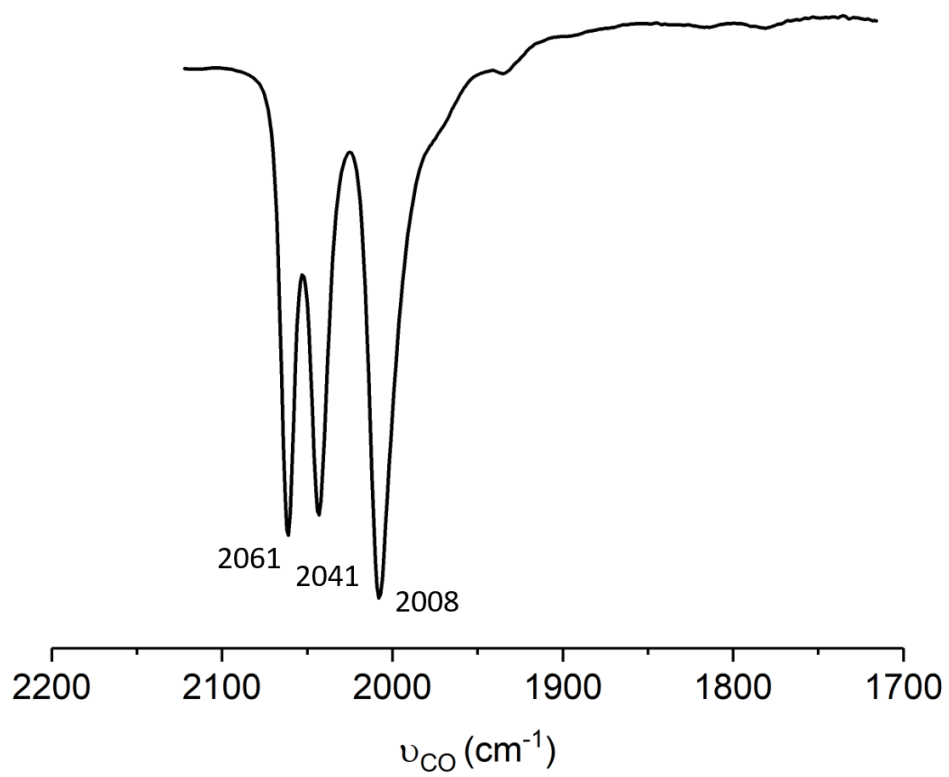

**Figure S15.** IR spectrum of a  $\text{CH}_2\text{Cl}_2$  solution of  $[(\mu\text{-H})\text{Fe}_2(\mu\text{-SH})_2(\text{CO})_4(\text{PPh}_3)_2]\text{BAr}^{\text{F}_4}$  at 20 °C.

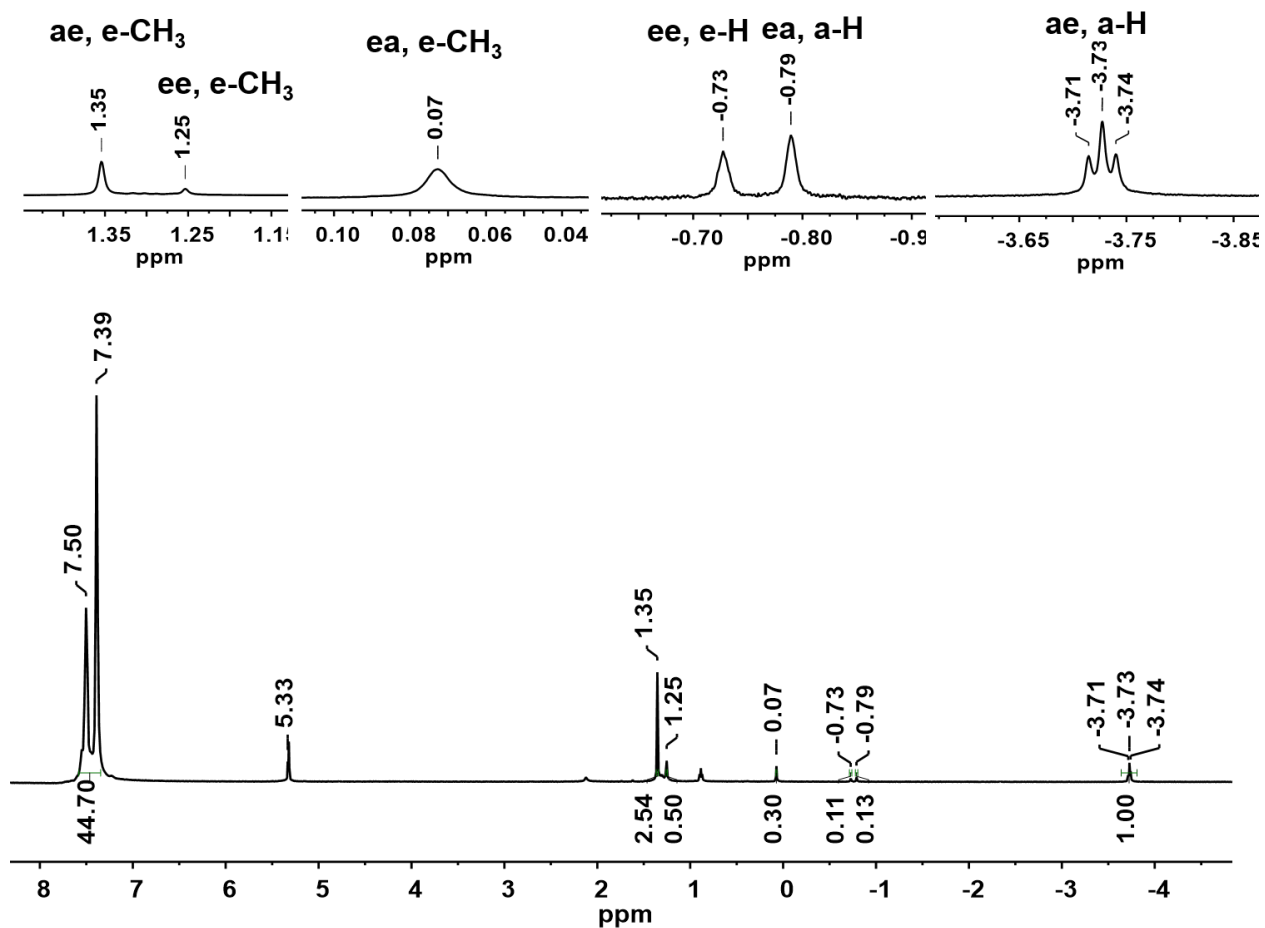

**Figure S16.**  $^1\text{H}$  NMR spectrum (500 MHz,  $\text{CD}_2\text{Cl}_2$ ) of  $\text{Fe}_2(\mu\text{-SMe})(\mu\text{-SH})(\text{CO})_4(\text{PPh}_3)_2$  at  $20^\circ\text{C}$ . *Inset:* expansion of SMe and SH signals.



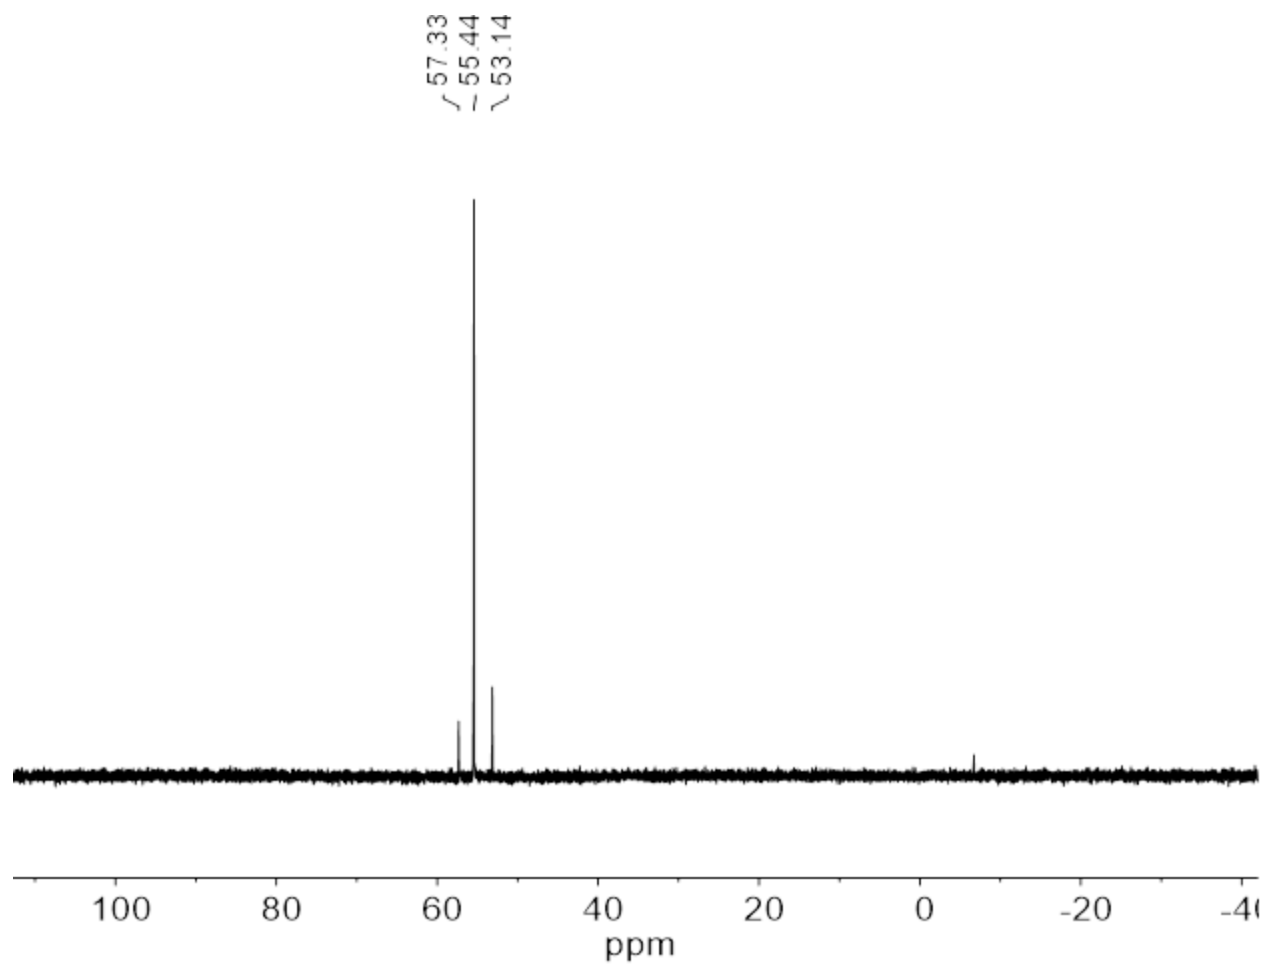

**Figure S17.**  $^{31}\text{P}$  NMR spectrum (202 MHz,  $\text{CD}_2\text{Cl}_2$ ) of  $\text{Fe}_2(\mu\text{-SMe})(\mu\text{-SH})(\text{CO})_4(\text{PPh}_3)_2$  at 20 °C.

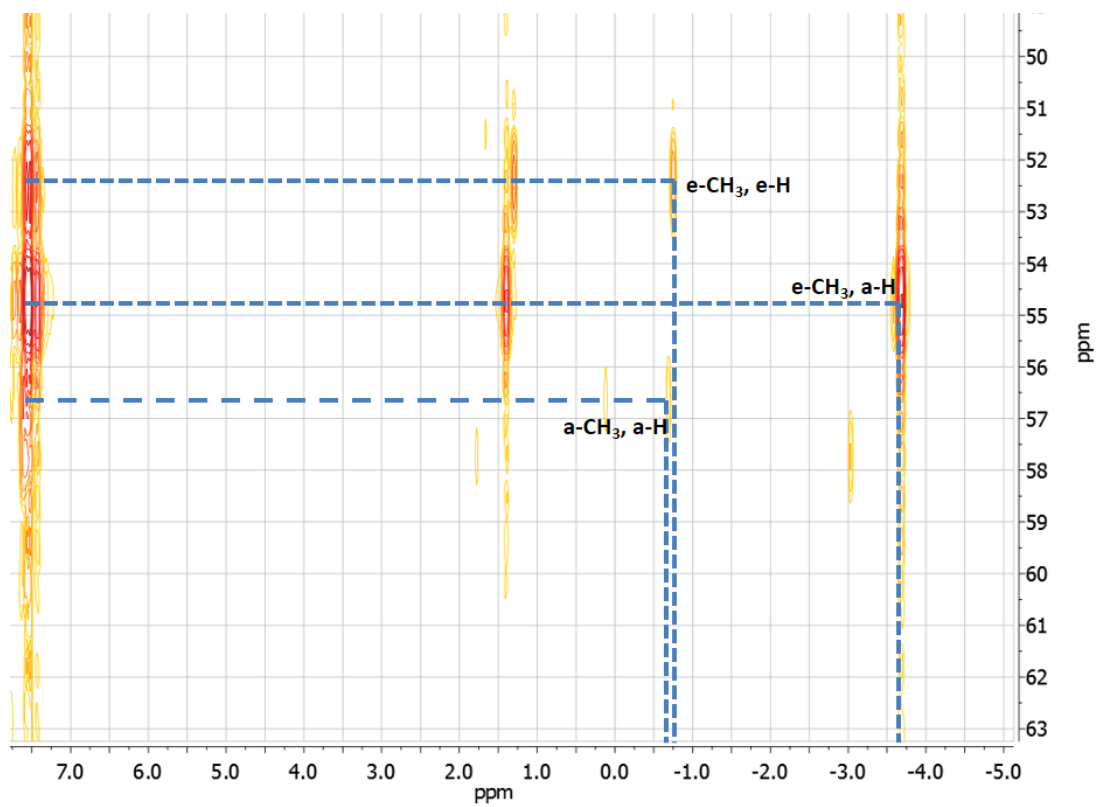

**Figure S18.**  $^1\text{H}$ - $^{31}\text{P}$  HMBC spectrum of  $\text{Fe}_2(\text{SMe})(\text{SH})(\text{CO})_4(\text{PPh}_3)_2$  at 20 °C.

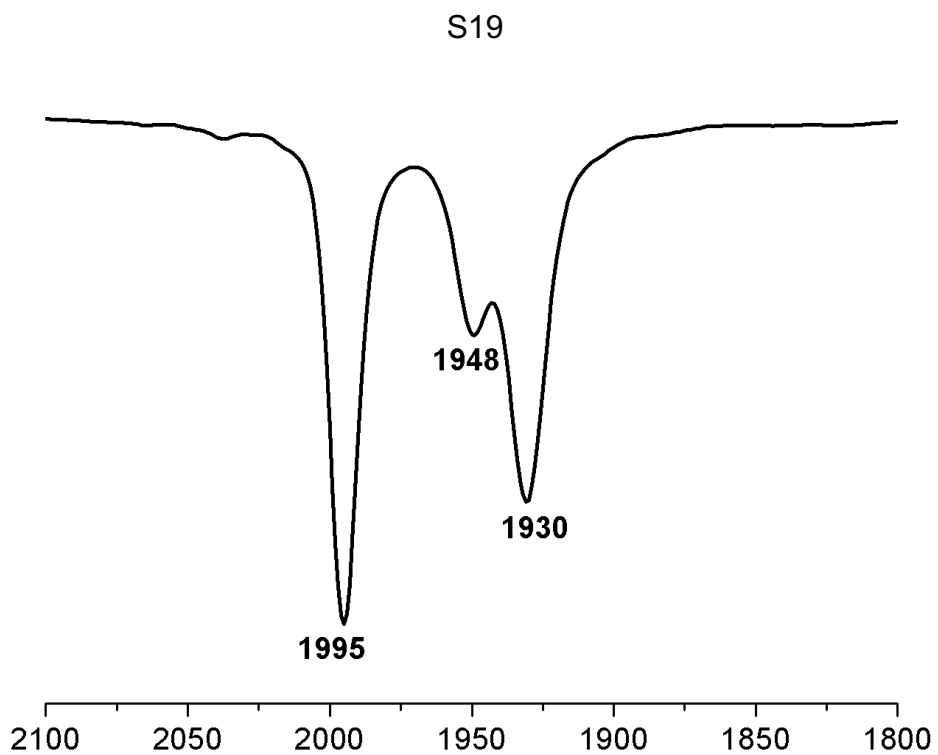

**Figure S19.** IR spectrum of a CH<sub>2</sub>Cl<sub>2</sub> solution of Fe<sub>2</sub>(μ-SMe)(μ-SH)(CO)<sub>4</sub>(PPh<sub>3</sub>)<sub>2</sub> at 20 °C.

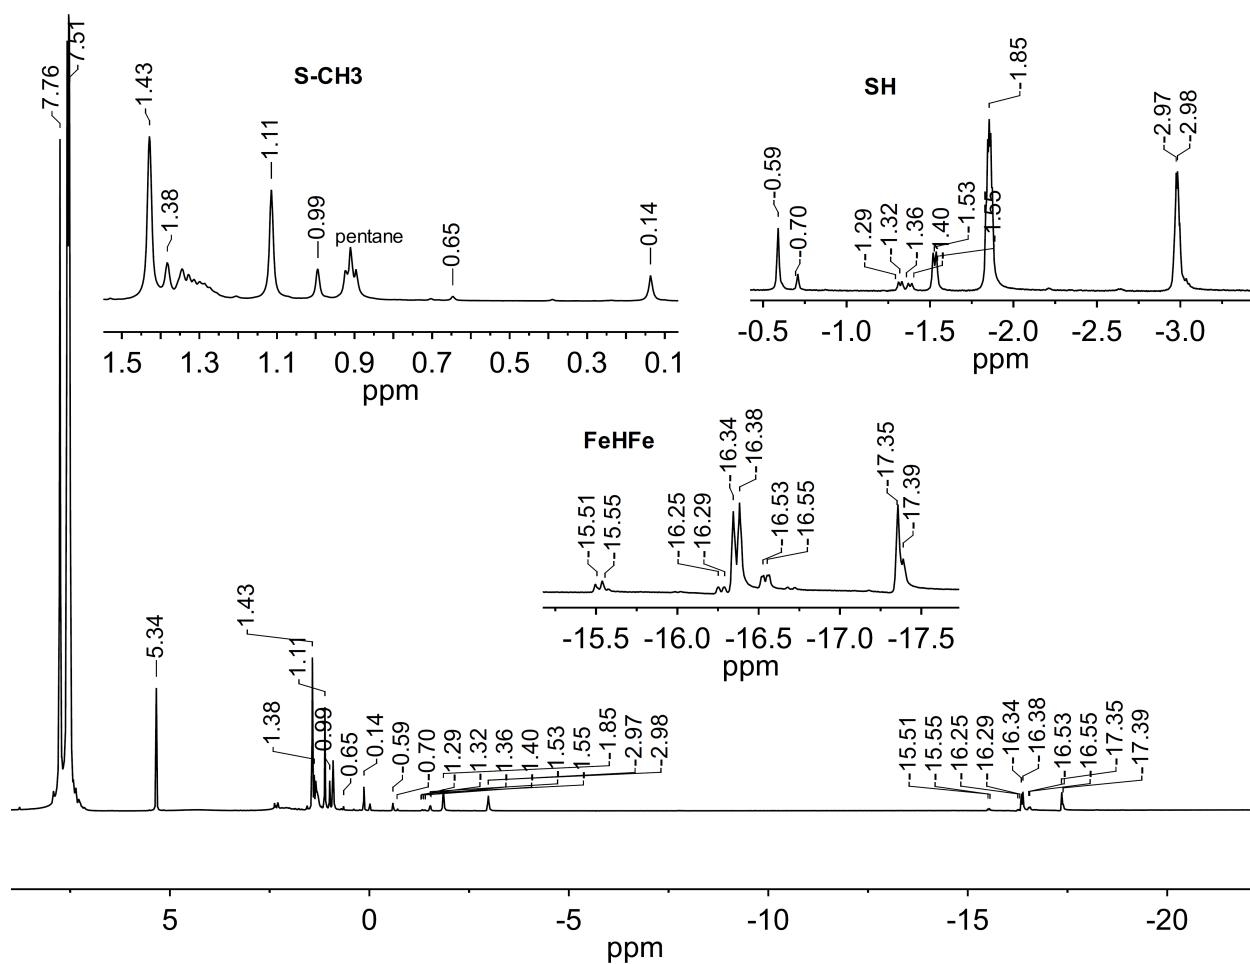

**Figure S20.**  $^1\text{H}$  NMR spectrum (500 MHz,  $\text{CD}_2\text{Cl}_2$ ) of  $[(\mu\text{-H})\text{Fe}_2(\mu\text{-SMe})(\mu\text{-SH})(\text{CO})_4(\text{PPh}_3)_2]\text{BARF}_4$  at  $20^\circ\text{C}$ . *Insets:* expansions of the spectra in the SMe, SH, and FeH regions.

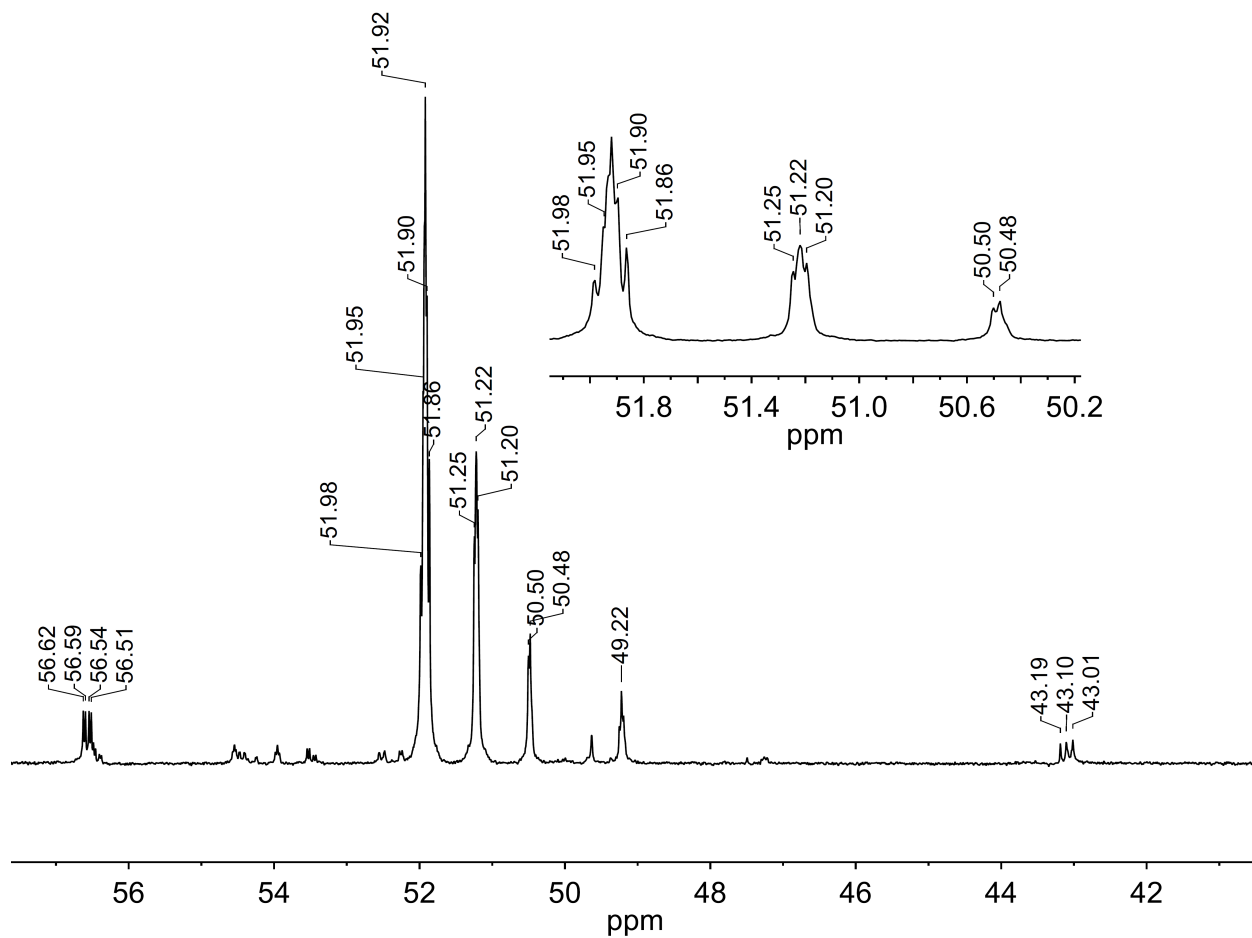

**Figure S21.**  $^{31}\text{P}$  NMR spectrum (202 MHz,  $\text{CD}_2\text{Cl}_2$ ) of  $[(\mu\text{-H})\text{Fe}_2(\mu\text{-SMe})(\mu\text{-SH})(\text{CO})_4(\text{PPh}_3)_2]\text{BAr}^{\text{F}}_4$  at 20 °C.

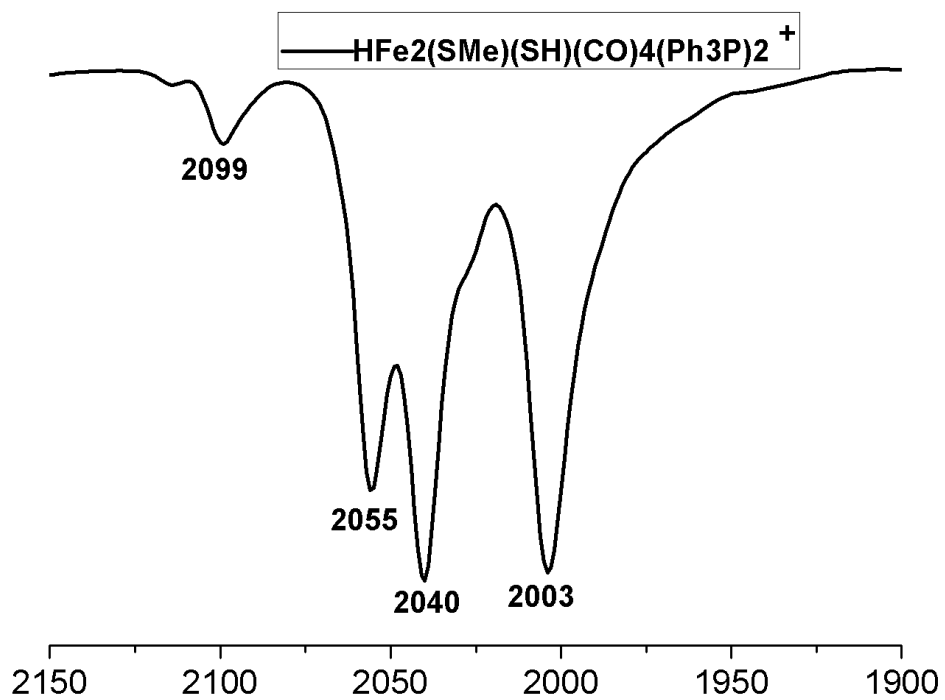

**Figure S22.** IR spectrum of CH<sub>2</sub>Cl<sub>2</sub> solution of [( $\mu$ -H)Fe<sub>2</sub>( $\mu$ -SMe)( $\mu$ -SH)(CO)<sub>4</sub>(PPh<sub>3</sub>)<sub>2</sub>][BAr<sup>F</sup><sub>4</sub>] at 20 °C.

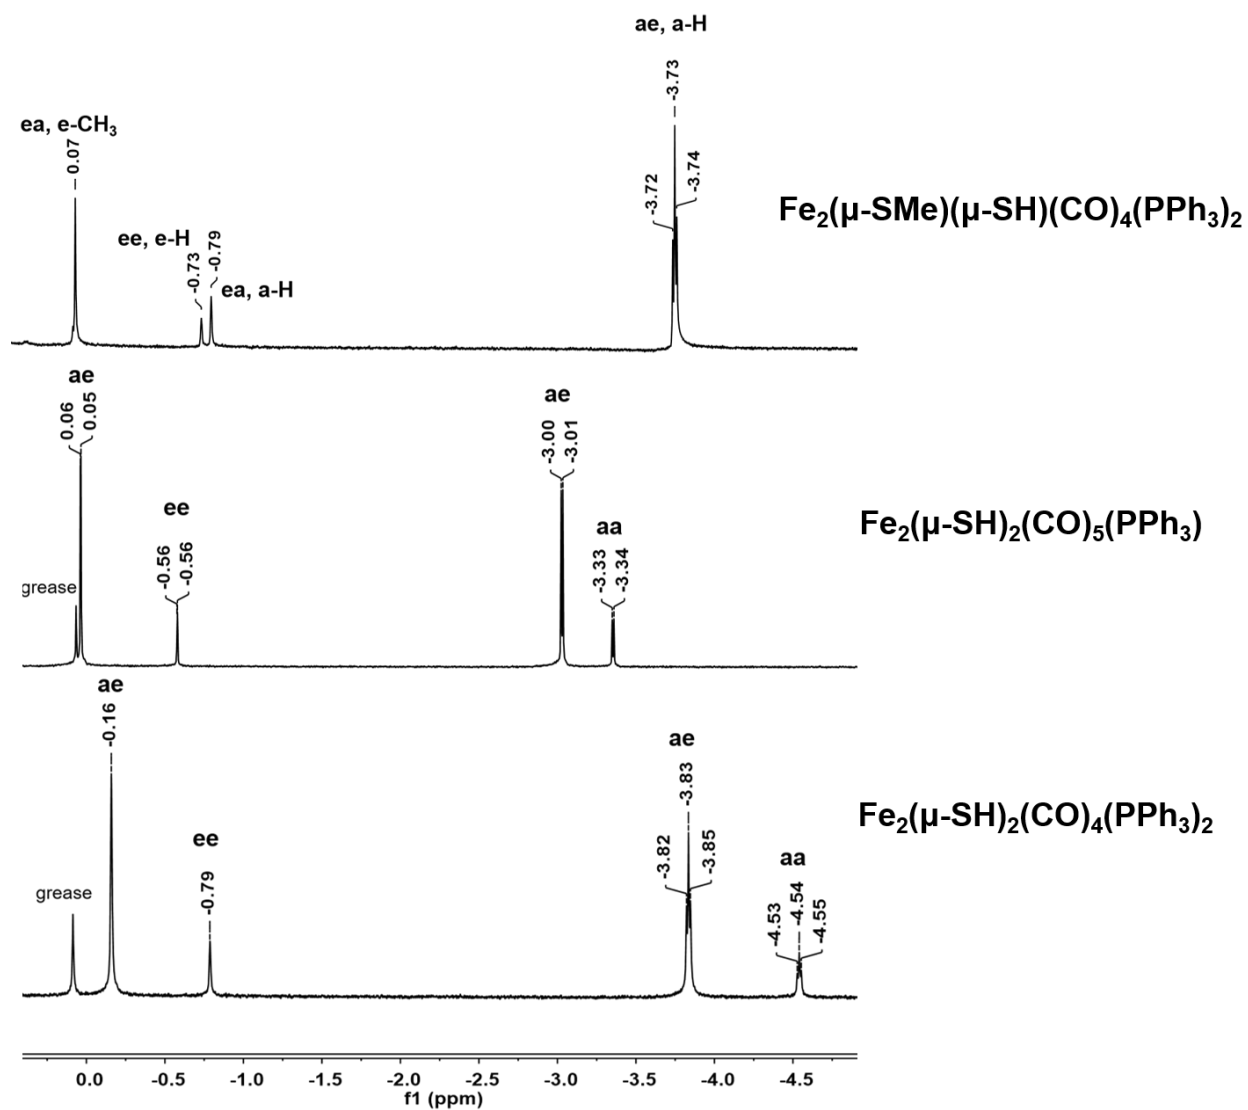

**Figure S23.**  $^1\text{H}$  NMR spectra (500 MHz,  $\text{CD}_2\text{Cl}_2$ ) of  $\text{Fe}_2(\mu\text{-SR})_2(\text{CO})_{6-x}(\text{PPh}_3)_x$  derivatives ( $\text{R} = \text{H}, \text{Me}$ ), depicting the  $\mu\text{-SH}$  signals.

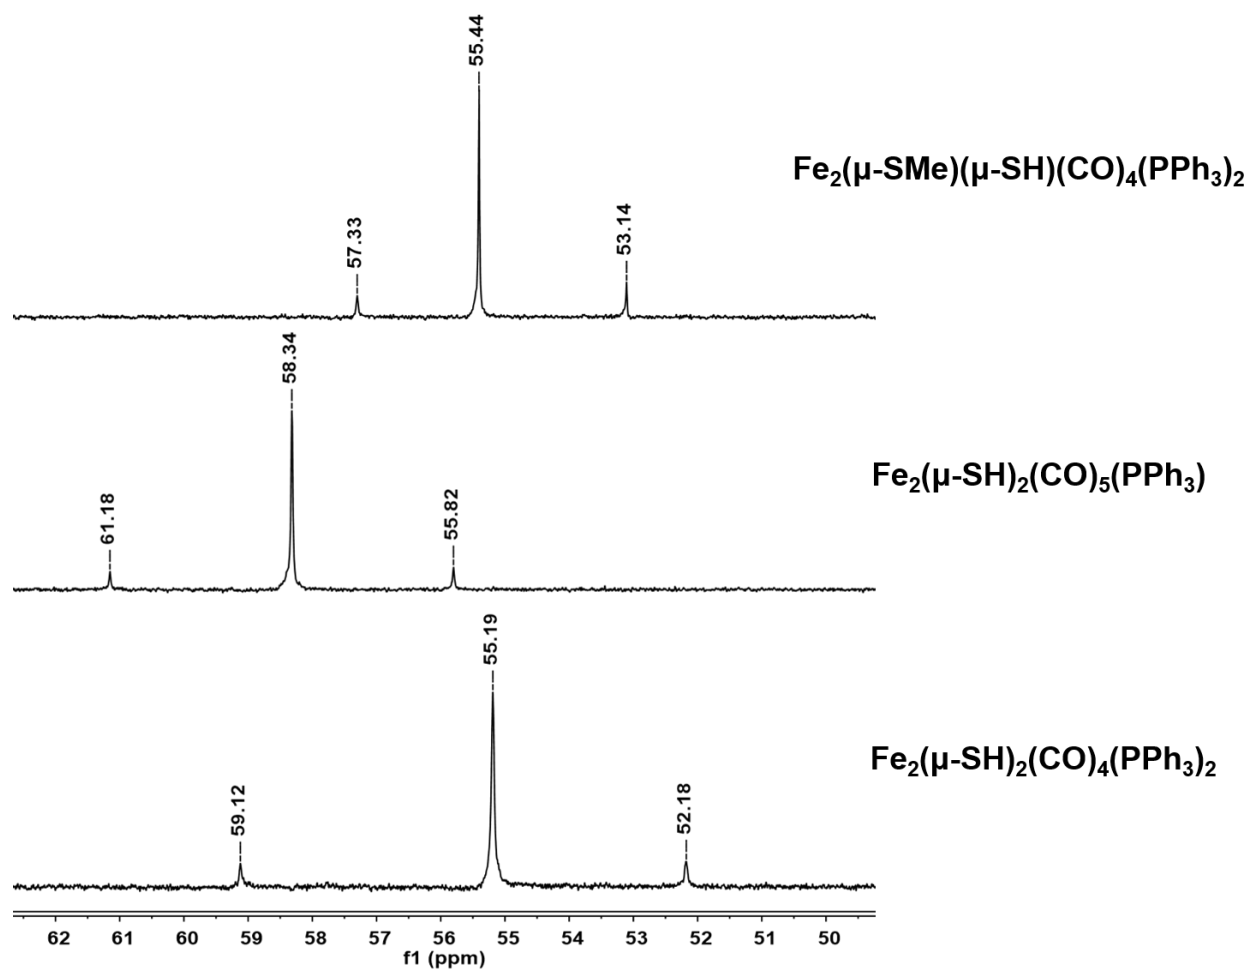

**Figure S24.**  $^{31}\text{P}$  NMR spectra (202 MHz,  $\text{CD}_2\text{Cl}_2$ ) of  $\text{Fe}_2(\mu\text{-SR})_2(\text{CO})_{6-x}(\text{PPh}_3)_x$  derivatives (R = H, Me).



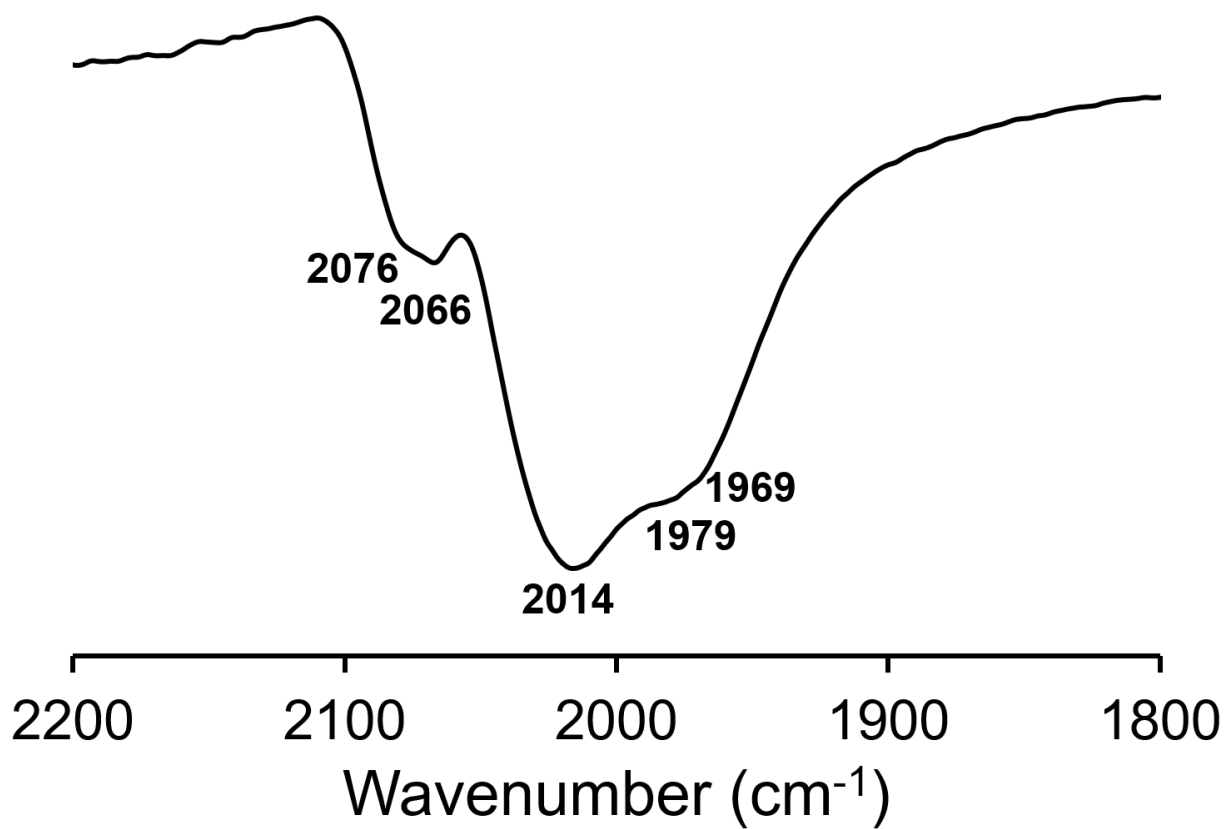

**Figure S25.** Reflectance IR spectrum of the black solid generated from the reaction of **1**<sup>HH</sup> with 2 equiv TEMPO in THF solution.

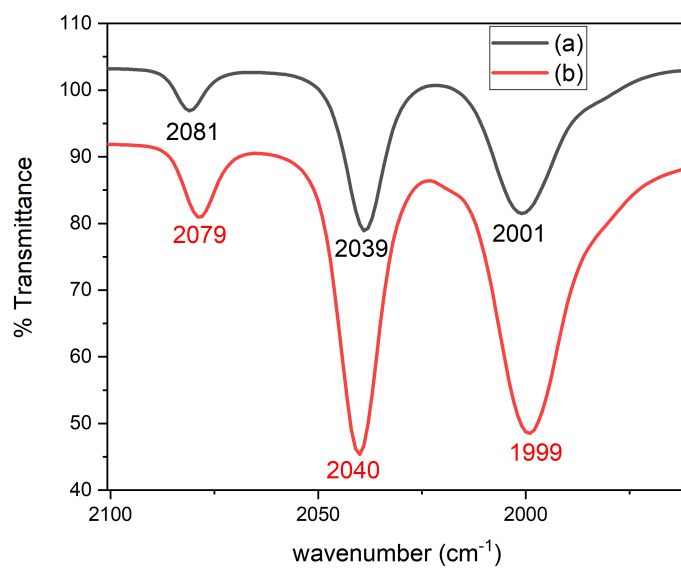

**Figure S26.** IR spectra of THF solutions of (a) **1** (b) **1<sup>HH</sup>**.
